# Supplementary material for: Effectiveness and safety of yoga to treat chronic and acute pain: a rapid review of systematic reviews
Source: PubMed Central journal article supplement — BMJ Open. 2021 Dec 30;11(12):e048536. doi: 10.1136/bmjopen-2020-048536 (PMC8719171; doi:10.1136/bmjopen-2020-048536), 2021-12-30
Supplement: bmjopen-2020-048536supp002.pdf [file bmjopen-2020-048536supp002.pdf]

**Supplementary file 2. Search strategy**

| Source        | Date       | Query                                                                                                                                                                                                                                                                  | Results    |
|---------------|------------|------------------------------------------------------------------------------------------------------------------------------------------------------------------------------------------------------------------------------------------------------------------------|------------|
| Pubmed        | 27/09/2019 | ("Yoga"[Mesh]) AND ("Acute Pain"[Mesh] OR Acute Pains OR Pain, Acute OR Pains, Acute)                                                                                                                                                                                  | 8          |
| Pubmed        | 27/09/2019 | ("Yoga"[Mesh]) AND ("Chronic Pain"[Mesh] OR Chronic Pains OR Pains, Chronic OR Pain, Chronic OR Widespread Chronic Pain OR Chronic Pain, Widespread OR Chronic Pains, Widespread OR Pain, Widespread Chronic OR Pains, Widespread Chronic OR Widespread Chronic Pains) | 145        |
| VHL           | 27/09/2019 | (ioga OR yoga) AND ("acute pain" OR "Dor Aguda" OR "Dolor Agudo")                                                                                                                                                                                                      | 341        |
| VHL           | 27/09/2019 | (ioga OR yoga) AND ("Dor Crônica" OR "Chronic Pain" OR "Dolor Crónico")                                                                                                                                                                                                | 68         |
| HSE           | 27/09/2019 | Yoga                                                                                                                                                                                                                                                                   | 5          |
| Epistemonikos | 27/09/2019 | yoga AND "acute pain"                                                                                                                                                                                                                                                  | 0          |
| Epistemonikos | 27/09/2019 | Yoga AND "chronic pain"                                                                                                                                                                                                                                                | 22         |
| HE            | 27/09/2019 | Yoga                                                                                                                                                                                                                                                                   | 5          |
| EMBASE        | 27/09/2019 | 'yoga' AND [embase]/lim AND 'systematic review (topic)'/de                                                                                                                                                                                                             | 99         |
| <b>Total</b>  |            |                                                                                                                                                                                                                                                                        | <b>693</b> |
